# Supplementary material
Source: publisher figshare collection journal article supplement (https://acs.figshare.com/ndownloader/files/23535150)
Supplement: Supplementary file 1 [file 23535150]

## Supporting Information

### **Albumin Protects Lung Cells against Acrolein Cytotoxicity and Acrolein-adducted Albumin Increases Heme Oxygenase 1 Transcripts**

Kiflai Bein<sup>\*†</sup>, Rahel L. Birru<sup>†</sup>, Heather Wells<sup>†</sup>, Theodore P. Larkin<sup>†</sup>, Pamela S. Cantrell<sup>‡</sup>, Matthew V. Fagerburg<sup>‡,||</sup>, Xuemei Zeng<sup>‡</sup>, George D. Leikauf<sup>†</sup>

**Supporting Figure S1.** Hydralazine interacted with acrolein-adducted albumin and increased the UV absorbance peak of acrolein-adducted albumin. (A) Albumin control (Albumin) and acrolein-adducted albumin (ALB-ACR) samples that had been preincubated (37°C, 1 h) in the absence or presence of hydralazine were centrifuged through Millipore ultra-2ml filter. The hydralazine in the retentate was determined from the filtrate absorbance spectrophotometrically measured at 263 nm. (B) HBSS, albumin (ALB) and acrolein-adducted albumin (ACR-ALB) samples that had been preincubated (37°C, 1 h) in the absence or presence of hydralazine (HYD) were centrifuged through Millipore ultra-2ml filter. The UV spectrum of the retentate samples at 240-340 nm was spectrophotometrically determined.

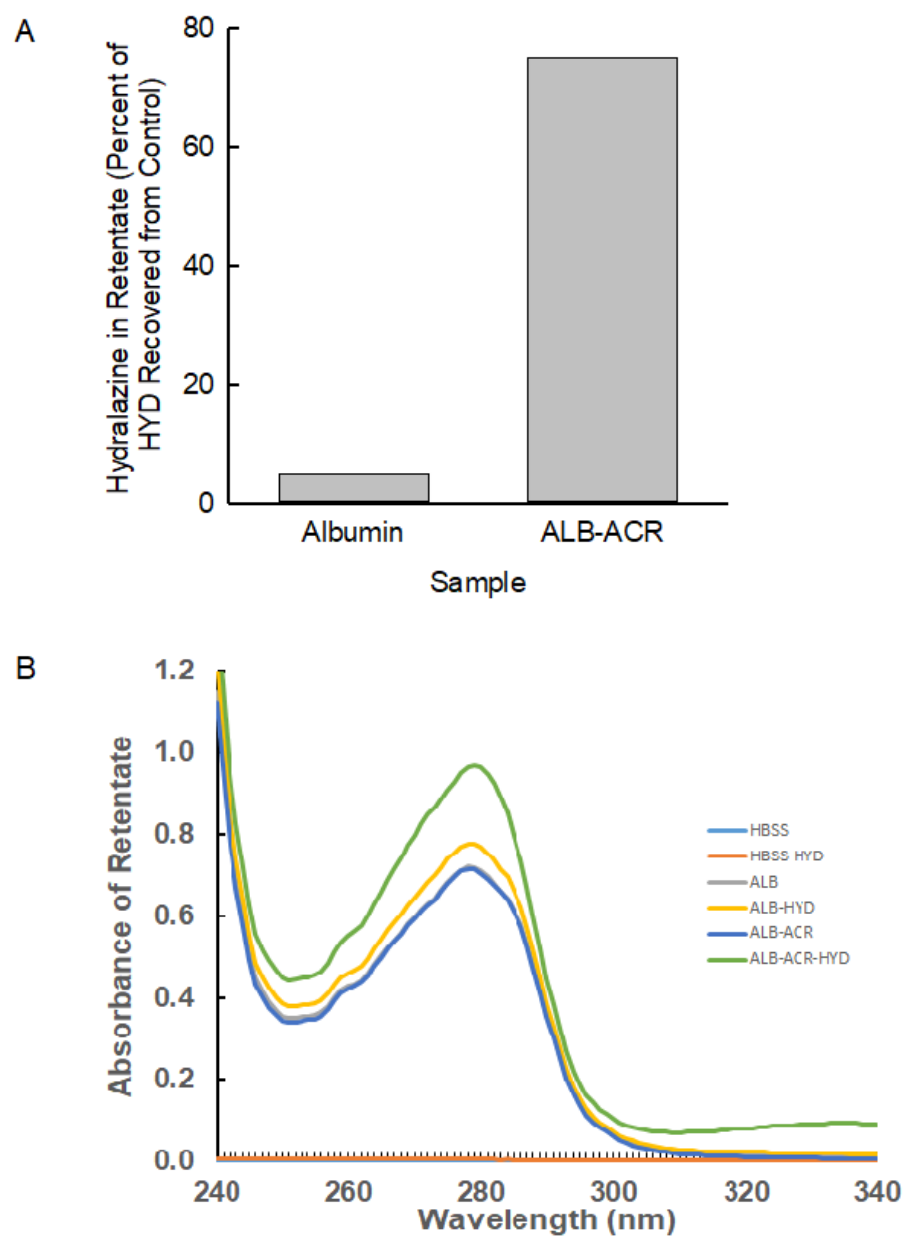

Supporting Figure S1
